# Supplementary material for: Dopaminergic inhibition of gonadotropin-releasing hormone neurons in the cichlid fish,Astatotilapia burtoni
Source: Oxford University Press journal article supplement (doi:10.1242/jeb.147637), 2016-01-01
Supplement: jeb147637supp.pdf [file jeb147637supp.pdf]

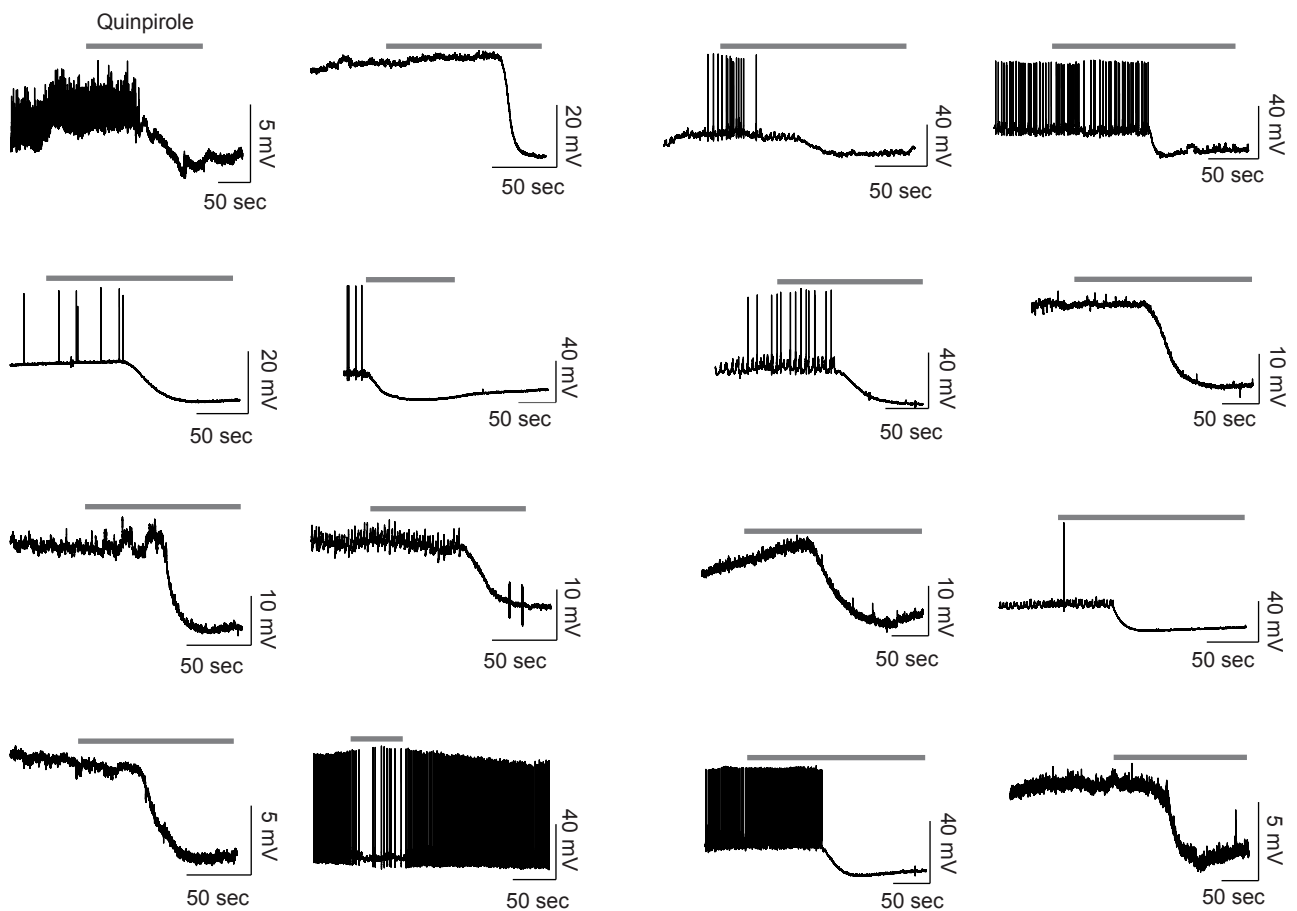

Figure S1: Intracellular recordings from GnRH1 neurons comprising the population reported in Fig. 2D. For all neurons, application of quinpirole elicited membrane hyperpolarization. Grey bar = timing of quinpirole application.
